# Supplementary material
Source: Research Square preprint supplement (doi:10.21203/rs.3.rs-9013617/v1)
Supplement: Supplementary file 1 [file 23cc15720d2773bffe92ce5e.xlsx]

## Sheet: Fig.2B
Fig. 2B
		Fig.2B_ZO-1					Fig.2B_ZO-2
		Repl.#1	JAM-C+EGFP-ZO1				Repl.#1	JAM-C+EGFP-ZO2
		JC+ / EGFP+		59			JC+ / EGFP+		55
		EGFP @ CC		58			EGFP @ CC		52
		EGFP NOT @CC		1			EGFP NOT @CC		3
		Repl.#2	JAM-C+EGFP-ZO1				Repl.#2	JAM-C+EGFP-ZO2
		JC+ / EGFP+		77			JC+ / EGFP+		74
		EGFP @ CC		77			EGFP @ CC		70
		EGFP NOT @CC		0			EGFP NOT @CC		4
		Repl.#3	JAM-C+EGFP-ZO1				Repl.#3	JAM-C+EGFP-ZO2
		JC+ / EGFP+		59			JC+ / EGFP+		53
		EGFP @ CC		59			EGFP @ CC		51
		EGFP NOT @CC		0			EGFP NOT @CC		2

## Sheet: Fig.3B
Fig. 3B		Fig.3B_JC-fl					Fig.3B_JC-d5
		Repl.#1	JAM-Cfl vs ZO-2				Repl.#1	JAM-Cd5 vs ZO-2
		JC+		119			JCd5+		109
		JC+ u ZO2+		119			JCd5+ u ZO2+		1
		JC+ u ZO2-		0			JCd5+ u ZO2-		108
		Repl.#2	JAM-Cfl vs ZO-2				Repl.#2	JAM-Cd5 vs ZO-2
		JC+		114			JCd5+		104
		JC+ u ZO2+		112			JCd5+ u ZO2+		1
		JC+ u ZO2-		2			JCd5+ u ZO2-		103
		Repl.#3	JAM-Cfl vs ZO-2				Repl.#3	JAM-Cd5 vs ZO-2
		JC+		127			JCd5+		104
		JC+ u ZO2+		125			JCd5+ u ZO2+		0
		JC+ u ZO2-		2			JCd5+ u ZO2-		104

## Sheet: Fig.5C
Fig. 5C
		JAM-C + Myc-P123SG/WT					JAM-C + Myc-P123SG/P1M					JAM-C + Myc-P123SG/P2M					JAM-C + Myc-P123SG/P3M					JAM-C + Myc-P123SG/P23M
		Replikate #1					Replikate #1					Replikate #1					Replikate #1					Replikate #1
		CS#19	JAM-C vs WT				CS#1	JAM-C vs P1M				CS#2	JAM-C vs P2M				CS#9	JAM-C vs P3M				CS#20	JAM-C vs P23M
		JC+		50			JC+		50			JC+		51			JC+		144			JC+		52
		JC+ u ZO2+		50			JC+ u ZO2+		49			JC+ u ZO2+		49			JC+ u ZO2+		47			JC+ u ZO2+		5
		JC+ u ZO2-		0			JC+ u ZO2-		1			JC+ u ZO2-		2			JC+ u ZO2-		97			JC+ u ZO2-		47
		Replikate #2					Replikate #2					Replikate #2					Replikate #2					Replikate #2
		CS#21	JAM-C vs WT				CS#10	JAM-C vs P1M				CS#11	JAM-C vs P2M				CS#5	JAM-C vs P3M				CS#22	JAM-C vs P23M
		JC+		54			JC+		54			JC+		55			JC+		84			JC+		55
		JC+ u ZO2+		51			JC+ u ZO2+		52			JC+ u ZO2+		55			JC+ u ZO2+		33			JC+ u ZO2+		5
		JC+ u ZO2-		3			JC+ u ZO2-		2			JC+ u ZO2-		0			JC+ u ZO2-		51			JC+ u ZO2-		50
		Replikate #3					Replikate #3					Replikate #3					Replikate #3					Replikate #3
		CS#25	JAM-C vs WT				CS#7	JAM-C vs P1M				CS#4	JAM-C vs P2M				CS#6	JAM-C vs P3M				CS#10	JAM-C vs P23M
		JC+		51			JC+		52			JC+		69			JC+		121			JC+		100
		JC+ u ZO2+		50			JC+ u ZO2+		52			JC+ u ZO2+		68			JC+ u ZO2+		41			JC+ u ZO2+		15
		JC+ u ZO2-		1			JC+ u ZO2-		0			JC+ u ZO2-		1			JC+ u ZO2-		71			JC+ u ZO2-		85

## Sheet: Fig.6B
Fig. 6B
		JAM-C + Myc-ZO-2/P3SG_WT				JAM-C + Myc-ZO-2/P3SG_LLSS
		Replikate #1				Replikate #1
		CS#5	JAM-C vs P3SG			CS#6	JAM-C vs P3SG_LLSS
		JC+	71			JC+	76
		JC+ u ZO2+	68			JC+ u ZO2+	23
		JC+ u ZO2-	3			JC+ u ZO2-	53
		Replikate #2				Replikate #2
		CS#5	JAM-C vs P3SG			CS#6	JAM-C vs P3SG_LLSS
		JC+	67			JC+	75
		JC+ u ZO2+	64			JC+ u ZO2+	27
		JC+ u ZO2-	3			JC+ u ZO2-	48
		Replikate #3				Replikate #3
		CS#7	JAM-C vs P3SG			CS#8	JAM-C vs P3SG_LLSS
		JC+	70			JC+	77
		JC+ u ZO2+	66			JC+ u ZO2+	26
		JC+ u ZO2-	4			JC+ u ZO2-	51

## Sheet: Fig.7B
Fig. 7B
		JAM-C + EGFP-CGN					JAM-A + EGFP-CGN
		Replikate #1	JAM-C+EGFP-CGN				Replikate #1	JAM-A+EGFP-CGN
		JC+ / EGFP+		71			JA+ / EGFP+		71
		EGFP @ CC		68			EGFP @ CC		68
		EGFP NOT @CC		3			EGFP NOT @CC		3
		Replikate #2	JAM-C+EGFP-CGN				Replikate #2	JAM-A+EGFP-CGN
		JC+ / EGFP+		75			JA+ / EGFP+		73
		EGFP @ CC		75			EGFP @ CC		71
		EGFP NOT @CC		0			EGFP NOT @CC		2
		Replikate #3	JAM-C+EGFP-CGN				Replikate #3	JAM-A+EGFP-CGN
		JC+ / EGFP+		56			JA+ / EGFP+		66
		EGFP @ CC		54			EGFP @ CC		64
		EGFP NOT @CC		2			EGFP NOT @CC		2

## Sheet: Fig.7D
Fig. 7D
		JAM-C/fl + EGFP-CGN					JAM-C/d5 + EGFP-CGN
		Replikate #1	JAM-C+EGFP-CGN				Replikate #1	JAM-CΔ5+EGFP-CGN
		JC+ / EGFP+		91			JC+ / EGFP+		58
		EGFP @ CC		83			EGFP @ CC		5
		EGFP NOT @CC		8			EGFP NOT @CC		53
		Replikate #2	JAM-C+EGFP-CGN				Replikate #2	JAM-CΔ5+EGFP-CGN
		JC+ / EGFP+		91			JC+ / EGFP+		35
		EGFP @ CC		81			EGFP @ CC		2
		EGFP NOT @CC		10			EGFP NOT @CC		33
		Replikate #3	JAM-C+EGFP-CGN				Replikate #3	JAM-CΔ5+EGFP-CGN
		JC+ / EGFP+		97			JC+ / EGFP+		38
		EGFP @ CC		96			EGFP @ CC		3
		EGFP NOT @CC		1			EGFP NOT @CC		35

## Sheet: Fig.8B
Fig. 8B
	Replicate #1
		WT				JAM-A KO				JAM-A KO + mJAM-A
		Mean Intensity ZO-1	Mean Intensity JAM-C	JAM-C/ZO-1		Mean Intensity ZO-1	Mean Intensity JAM-C	JAM-C/ZO-1		Mean Intensity ZO-1	Mean Intensity JAM-C	JAM-C/ZO-1
		60.6595	33.9718	0.56004		76.4705	97.924	1.28054		74.3284	55.2398	0.743185
		79.1364	40.9455	0.517404		81.9929	135.469	1.6522		64.9864	45.6884	0.703047
		80.8554	44.8478	0.554667		78.106	113.976	1.45925		66.3576	60.6124	0.913421
		79.2065	42.3685	0.534912		83.666	104.394	1.24775		61.698	69.1875	1.12139
		88.2	33.1344	0.375673		71.0986	112.801	1.58655		68.4	62.5886	0.915038
		86.775	38.9904	0.449327		81.0496	131.511	1.6226		63.1578	79.962	1.26607
		69.5587	32.8652	0.472481		77.8321	137.476	1.76631		71.6214	57.0252	0.796204
		82.5824	40.4686	0.49004		82.8862	102.355	1.23488		62.4839	49.8733	0.798179
		84.5333	32.3462	0.382644		89.2481	125.456	1.4057		67.9229	57.9159	0.852671
		82.5662	31.0026	0.375488		74.0827	134.464	1.81506		81.0904	50.5639	0.62355
		82.0859	37.0218	0.451014		78.6121	140.751	1.79045		71.4717	64.2586	0.899078
		71.5192	30.8423	0.431245		85.6534	145.899	1.70337		64.4118	70.9822	1.10201
		96.7896	37.2271	0.384619		85.5207	99.3119	1.16126
									Mean	68.1609	60.3248	0.894486
	Mean	80.3437	36.6179	0.459966	Mean	80.4784	121.676	1.51738
	Replicate #2
		WT				JAM-A KO				JAM-A KO + mJAM-A
		Mean Intensity ZO-1	Mean Intensity JAM-C	JAM-C/ZO-1		Mean Intensity ZO-1	Mean Intensity JAM-C	JAM-C/ZO-1		Mean Intensity ZO-1	Mean Intensity JAM-C	JAM-C/ZO-1
		80.9745	25.6984	0.317365		103.335	50.3273	0.487032		91.0167	49.6333	0.545321
		84.6309	31.1234	0.367754		108.591	54.1636	0.498786		82.85	42.6613	0.514922
		100.19	34.6736	0.346078		108.637	57.1461	0.526028		92.9029	40.3324	0.434134
		77.3987	26.4295	0.341473		98.302	52.0163	0.529148		87.9723	34.6468	0.393838
		87.4084	27.6374	0.316187		91.261	50.5732	0.55416		101.356	32.292	0.3186
		92.2288	30.8553	0.334552		102.944	55.0387	0.534649		97.0985	30.3381	0.312446
		89.2689	28.4978	0.319235		87.4707	44.5761	0.509612		106.222	33.7273	0.317519
		102.161	31.6816	0.310113		101.105	57.1154	0.564911		105.823	45.0128	0.425359
		101.624	27.4463	0.270077		95.9811	64.5306	0.672327		85.2713	36.6	0.429218
		91.9029	19.8238	0.215704		90.4325	51.8725	0.573605		87.7513	45.4	0.517371
		98.8297	19.8238	0.200586		72.6568	43.5938	0.599997		78.644	43.6264	0.554733
		98.985	20.9385	0.211532		101.578	49.5919	0.488213
		105.559	20.8136	0.197175		90.4406	44.2781	0.489582	Mean	92.4461	39.4791	0.433042
		94.3089	19.587	0.207689		88.2809	43.8681	0.496915
		103.01	21.4538	0.20827		107.423	50.0545	0.465959
	Mean	93.8987	25.7656	0.277586	Mean	95.7868	51.3351	0.537498
	Replicate #3
		WT				JAM-A KO				JAM-A KO + mJAM-A
		Mean Intensity ZO-1	Mean Intensity JAM-C	JAM-C/ZO-1		Mean Intensity ZO-1	Mean Intensity JAM-C	JAM-C/ZO-1		Mean Intensity ZO-1	Mean Intensity JAM-C	JAM-C/ZO-1
		53.15	13.89	0.261336		68.1	44.78	0.657562		82.97	25.39	0.306014
		54.7	11.96	0.218647		67.49	44.65	0.661579		88.34	31.14	0.352502
		52.18	17.57	0.336719		75.35	36.6	0.485733		85.83	29.67	0.345683
		55.144	19.29	0.349811		65.55	53.88	0.821968		60.93	40.59	0.666174
		53.25	15.32	0.2877		70.19	53.57	0.763214		76.79	39.14	0.509702
		66.4	11.69	0.176054		70.42	53.1	0.754047		77.05	32.28	0.418949
		54.22	6.26	0.115456		62.04	56.23	0.906351		79.42	33.6	0.423067
		53.5	18.55	0.346729		72.58	45.13	0.621797		70.63	34.27	0.485205
		51.99	7.89	0.15176		66.35	62.05	0.935192		63.81	47.05	0.737345
		48.42	6.32	0.130525		74.69	37.61	0.503548		70.06	43.98	0.627748
		48.22	12.85	0.266487		61.8	46.97	0.760032		62.01	48.62	0.784067
		42.95	6.55	0.152503		70.06	45.46	0.648872		53.75	32.94	0.612837
		66.68	14.39	0.215807		58.66	50.34	0.858166		67.28	25.98	0.386147
		73.17	13.56	0.185322		62.74	66.72	1.06344		78.09	33.24	0.425663
		73.25	13.75	0.187713		71.26	49.22	0.69071		77.31	27.89	0.360755
		78.78	13.25	0.16819		82.35	42.67	0.518154		69.72	25.3	0.36288
		82.65	14.79	0.178947		68.33	63.12	0.923752		75.92	38.13	0.502239
		83.75	18.06	0.215642		72.81	51.4	0.705947		71.64	32.14	0.448632
		67.36	15.19	0.225505		71.47	54.88	0.767875		68.36	26.09	0.381656
		80.6	13.12	0.162779		64.24	50.3	0.783001		64.29	27.06	0.420905
		76.47	12.86	0.168171		69.81	32.03	0.458817		67.13	20.15	0.300164
		86.74	13.12	0.151257		69.28	43.54	0.628464		74.9	28.5	0.380507
		87.91	7.93	0.0902059		84.45	50.39	0.596684		72.71	30.51	0.419612
		83.26	9.43	0.11326		65.36	49.12	0.75153		69.12	30.06	0.434896
		82.84	9.41	0.113592		68.71	36.95	0.537767		73.92	28.34	0.383387
		74	9.96	0.134595		67.09	57.25	0.853331		64.48	27.04	0.419355
		72.14	10.19	0.141253		51.33	61.01	1.18858		54.2	24.55	0.452952
		74.51	10.09	0.135418		69.81	47.77	0.684286		64.03	28.06	0.438232
		93.16	11.27	0.120975						63.24	28.2	0.44592
		83.44	10.53	0.126198	Mean	68.6543	49.5264	0.733229		64.87	28.57	0.440419
										73.28	30.61	0.417713
	Mean	68.4945	12.3013	0.187619						80.38	29.44	0.36626
									Mean	70.8269	31.5166	0.4518

## Sheet: Fig.S3
Fig. S3B
	Replicate #1
			WT					JAM-A KO					JAM-A KO + mJAM-A
			Mean Intensity ZO-1	Mean Intensity JAM-C	JAM-C/ZO-1			Mean Intensity ZO-1	Mean Intensity JAM-C	JAM-C/ZO-1			Mean Intensity ZO-1	Mean Intensity JAM-C	JAM-C/ZO-1
			99.7553	21.0921	0.211439			82.3472	39.6833	0.481903			83.1014	18.7342	0.225438
			83.4937	21.0658	0.252304			81.0604	33.9042	0.418258			117.787	20.7137	0.175857
			88.5164	16.5471	0.186938			109.088	53.4	0.489512			88.6583	9.85292	0.111134
			95.1465	31.4186	0.330213			96.1952	38.8524	0.403891			91.1839	9.85292	0.108055
			95.8298	25.4281	0.265346			92.0962	39.4231	0.428064			116.089	14.7802	0.127318
			95.8298	32.4576	0.3387			102.943	39.3897	0.382635			112.031	18.6158	0.166167
			108.791	33.5694	0.308567			81.7	42.4167	0.519176			94.1733	21.9533	0.233116
			103.597	41.0514	0.39626			101.609	33.0318	0.325086			117.666	15.8807	0.134964
			99.169	19.3048	0.194665			111.842	37.559	0.335821			108.288	17.4548	0.161188
			96.8143	26.6819	0.275599			110.492	35.8444	0.324407			107.458	9.05431	0.0842587
			87.4641	25.4521	0.291			94.7571	31.0251	0.327417			98.6671	9.05431	0.0917662
			68.4658	15.2755	0.223111			109.958	37.2197	0.338489			98.1844	18.0319	0.183653
			88.8082	26.751	0.301223			89.4253	27.8919	0.311902			107.27	14.5935	0.136045
			97.2686	33.4086	0.343467			83.42	24.613	0.295049			109.018	19.7147	0.180839
			80.9158	20.9624	0.259064			120.832	47.2721	0.39122			95.15	16.9146	0.177768
			85.5378	20.2322	0.236529			106.327	38.3295	0.360487			120.64	14.5282	0.120426
			104.067	29.4545	0.283035			107.795	39.3477	0.365022			91.4072	8.74261	0.0956446
			104.677	26.2923	0.251176			117.933	57.2333	0.485302			130.445	19.0127	0.145752
			84.6938	17.5209	0.206873			99.5299	52.6234	0.528719			115.86	18.7702	0.162008
			91.908	21.5492	0.234465			97.3534	53.0086	0.544497			78.2707	7.01707	0.0896513
								72.4769	45.8846	0.633093			93.3609	9.57203	0.102527
		Mean	93.0375	25.2758	0.269499								111.958	22.5415	0.201338
							Mean	98.5325	40.3787	0.413807			121.563	15.4549	0.127135
													115.348	15.0426	0.130411
													117.041	24.5366	0.20964
													131.029	13.8911	0.106016
												Mean	106.602	15.5504	0.145697
	Replicate #2
			WT					JAM-A KO					JAM-A KO + mJAM-A
			Mean Intensity ZO-1	Mean Intensity JAM-C	JAM-C/ZO-1			Mean Intensity ZO-1	Mean Intensity JAM-C	JAM-C/ZO-1			Mean Intensity ZO-1	Mean Intensity JAM-C	JAM-C/ZO-1
			103.657	8.52857	0.0822767			113.829	21.7071	0.1907			82.337	4.83908	0.0587717
			95.9032	13.8481	0.144396			103.236	21.6189	0.209412			104.9	8.46333	0.08068
			85.1647	12.8735	0.15116			119.938	37.375	0.311621			98.4725	10.4902	0.106529
			106.333	21.4126	0.201373			112	17.068	0.152393			118.162	7.75216	0.0656061
			94.1344	11.5784	0.122999			110.326	11.6158	0.105287			113.059	9.59821	0.0848958
			124.531	7.99046	0.0641646			107.237	9.57704	0.0893072			78.4843	7.71237	0.0982663
			122.066	7.17379	0.05877			100.737	50.0687	0.497022			113.218	5.27624	0.0466025
			111.845	7.39725	0.0661384			112.632	28.9064	0.256645			97.4519	6.62105	0.0679417
			129.25	14.8822	0.115143			102.005	15.9137	0.156008			109.328	7.68558	0.0702984
			114.79	11.2594	0.0980869			107.818	15.563	0.144344			117.57	8.1486	0.0693084
			120.888	14.7256	0.121813			81.1043	12.5683	0.154964			113.57	3.33154	0.0293347
			93.0109	5.83549	0.0627399			99.7977	33.3702	0.334379			82.4073	6.56927	0.0797171
			110.039	7.47429	0.0679238			112.33	22.3148	0.198654			116.754	10.3354	0.0885225
			110.002	17.1753	0.156136			93.8474	13.3777	0.142547			85.2167	4.76707	0.0559406
			99.7911	7.39405	0.0740953			105.045	11.8385	0.1127			103.934	8.42211	0.0810335
			97.7319	4.94957	0.0506444			114.471	18.0275	0.157485			97.1447	2.61038	0.0268711
			94.1726	7.29137	0.0774256			76.275	12.2287	0.160324			105.747	7.43617	0.0703202
			113.235	24.7483	0.218557			107.527	19.457	0.18095			96.7321	4.89098	0.0505621
			84.5431	7.27488	0.0860494			82.1897	14.9926	0.182414			113.747	10.3077	0.090619
			77.7724	5.46882	0.0703182			74.4909	12.3734	0.166106			97.5543	4.80057	0.0492092
			121.709	17.1445	0.140865			74.1513	11.8692	0.160068			87.854	6.11048	0.0695526
			105.445	22.2322	0.210842			102.963	29.65	0.287969			95.1348	4.94537	0.0519828
			114.135	4.79016	0.0419693			97.43	18.8113	0.193075
			106.351	3.45945	0.0325286							Mean	101.308	6.86881	0.0678439
							Mean	100.495	20.0127	0.197582
		Mean	105.687	11.1212	0.104851
	Replicate #3
			WT					JAM-A KO					JAM-A KO + mJAM-A
			Mean Intensity ZO-1	Mean Intensity JAM-C	JAM-C/ZO-1			Mean Intensity ZO-1	Mean Intensity JAM-C	JAM-C/ZO-1			Mean Intensity ZO-1	Mean Intensity JAM-C	JAM-C/ZO-1
			78.7744	5.02304	0.0637648			121.489	22.5472	0.185591			148.19	7.07875	0.0477681
			74.7081	8.32986	0.111499			111.284	19.6976	0.177004			120.923	7.27552	0.0601664
			127.228	5.65655	0.0444601			113.263	23.9074	0.211078			101.075	9.20253	0.0910469
			103.344	13.9307	0.134799			130.438	21.441	0.164376			94.2929	10.0196	0.106261
			91.7404	4.92737	0.0537099			154.311	16.3429	0.105909			86.9589	17.3699	0.199748
			87.2446	11.978	0.137293			121.122	17.2388	0.142325			74.6037	8.17769	0.109615
			99.7593	7.95926	0.0797847			105.232	12.8941	0.122531			147.236	4.91354	0.0333719
			118.336	12.8056	0.108214			109.727	34.7182	0.316404			121.757	17.3709	0.142669
			122.662	14.7858	0.120541			160.814	32.7903	0.203902			117.429	7.57512	0.0645083
			110.216	8.942	0.0811316			135.767	9.70037	0.0714485			97.7013	8.66882	0.0887277
			123.437	6.68167	0.0541303			128.866	7.49828	0.0581868			126.295	14.5052	0.114852
			138.584	10.7431	0.0775205			143.956	23.4494	0.162892			138.223	8.75051	0.0633072
			123.309	7.99857	0.0648663			136.12	20.9623	0.153999			106.809	8.0875	0.075719
			105.655	7.13828	0.067562			134.774	15.2078	0.11284			140.964	5.5187	0.0391497
			93.5702	15.6476	0.167228			119.208	9.8127	0.0823157			123.579	20.1587	0.163124
			109.607	6.178	0.0563652			119.705	9.398	0.0785097			124.52	24.0669	0.193277
			123.244	12.1619	0.0986815			116.16	13.8651	0.119362			100.428	20.5052	0.204179
			118.041	21.5795	0.182813			105.156	13.8359	0.131575			118.791	25.0442	0.210826
			128.269	2.99505	0.0233498			113.82	13.6746	0.120143			107.319	21.1606	0.197175
			153.093	20.8647	0.136287			99.2649	13.6746	0.137759			113.947	12.0424	0.105684
			105.492	4.14702	0.0393111			100.906	10.6436	0.105481			96.52	7.36657	0.0763217
			87.7651	6.24178	0.0711191			92.7954	10.9802	0.118327			130.082	15.3304	0.117851
			113.302	6.58672	0.0581344			138.69	21.7667	0.156945			135.916	21.7468	0.160002
								110.717	12.5195	0.113077
		Mean	110.321	9.70879	0.0883724			117.547	14.5363	0.123664		Mean	116.242	13.1277	0.115885
								140.78	13.4545	0.0955715
							Mean	122.381	16.7907	0.12878

## Sheet: Uncropped-Gels-Blots
		Fig. 3C, top					Fig. 3D, top						Fig. 4C, top					Fig. 5D, top					Fig. 5D, bottom					Fig. 6C				Fig. 6D
		Fig. 3C, bottom					Fig. 3D, bottom						Fig. 4C, bottom
